# Supplementary material
Source: PubMed Central journal article supplement (PMC5717155)
Supplement: JB.00345-17_zjb001184610s1.pdf [file JB.00345-17_zjb001184610s1.pdf]

**Table S1: PA14 wildtype and mutant Pa BCF and Pa PCF activities against planktonic 10AF growth.\***

| <b>Mutant ranking</b> | <b>Pa supernatant</b> | <b>Geometric mean of 4 MIC results</b> | <b>Range</b>  |
|-----------------------|-----------------------|----------------------------------------|---------------|
|                       | <b>PCF</b>            |                                        |               |
|                       | PA14 wildtype         | 1:431                                  | 1:256 – 1:512 |
| <b>1</b>              | <i>pvdD-pchE-</i>     | 1:6                                    | 1:4 – 1:8     |
| <b>2</b>              | <i>pvdD-</i>          | 1:27                                   | 1:16 – 1:64   |
| <b>3</b>              | <i>lasR-</i>          | 1:45                                   | 1:32 – 1:64   |
| <b>4</b>              | <i>lasR-rhlR-</i>     | 1:64                                   | 1:32 – 1:128  |
| <b>5</b>              | <i>rsmA-</i>          | 1:152                                  | 1:128 – 1:256 |
| <b>6</b>              | <i>HSI-1/2-</i>       | 1:215                                  | 1:128 – 1:256 |
| <b>7</b>              | <i>pqsA-</i>          | 1:215                                  | 1:128 – 1:256 |
| <b>8</b>              | <i>pqsH-</i>          | 1:215                                  | 1:128 – 1:256 |
| <b>9</b>              | <i>pvcA-</i>          | 1:256                                  | 1:256         |
|                       | <b>BCF</b>            |                                        |               |
|                       | PA14 wildtype         | 1:362                                  | 1:256 – 1:512 |
| <b>1</b>              | <i>pvdD-pchE-</i>     | 1:6                                    | 1:4 – 1:8     |
| <b>2</b>              | <i>pvdD-</i>          | 1:32                                   | 1:16 – 1:64   |
| <b>3</b>              | <i>lasR-</i>          | 1:54                                   | 1:32 – 1:64   |
| <b>4</b>              | <i>lasR-rhlR-</i>     | 1:64                                   | 1:64          |
| <b>5</b>              | <i>rsmYZ-</i>         | 1:181                                  | 1:128 – 1:256 |

\*BCF and PCF were evaluated by 4 MIC tests each. Titers shown are derived from the highest 2-fold dilution inhibiting the fungus. Only mutants with significant differences to PA14 wildtype are shown. Ranking: 1= highest loss of anti-fungal activity.

**Figure S1**

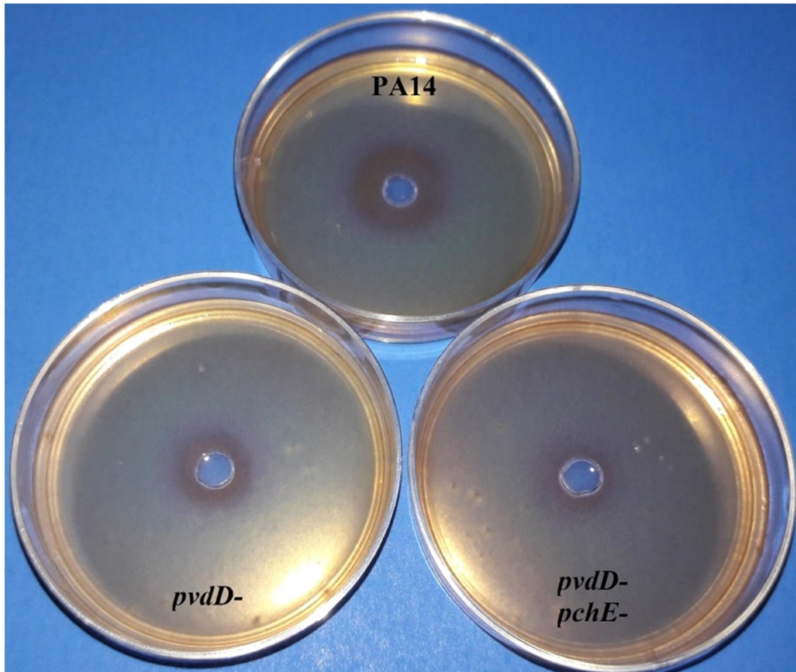

**Figure S1: Visualization of Af inhibition zones** For visualization of inhibition zones 60x15 mm Petri dishes containing mixtures of RPMI agar and  $2.5 \times 10^4$  10AF conidia/ml, were used. Wells were filled with 30  $\mu$ l of PA14 wildtype, pvdD-, or pvdD-/pchE- LC suspensions ( $5 \times 10^7$ /ml). Photographs were taken after 24 hours of incubation at 37°C.
